1 **Poor codon optimality as a signal to degrade transcripts with frameshifts**

2

3 Miquel Àngel Schikora-Tamarit<sup>1</sup>, Lucas B. Carey<sup>1</sup>

4 <sup>1</sup>Systems Bioengineering Program, Department of Experimental and Health Sciences,

5 Universitat Pompeu Fabra, Carrer Dr. Aiguader 88, 08003, Barcelona, Spain.

6

7 **Corresponding authors:**

8 MAST: [mikischikora@gmail.com](mailto:mikischikora@gmail.com), LBC: [lucas.carey@upf.edu](mailto:lucas.carey@upf.edu)

9 **Keywords:** nonsense-mediated decay, codon bias, frameshifts, mRNA quality, translation

10

11 **Abstract:**

12 Frameshifting errors are common and mRNA quality control pathways, such as nonsense-  
13 mediated decay (NMD), exist to degrade these aberrant transcripts. Recent work has shown  
14 the existence of a genetic link between NMD and codon-usage mediated mRNA decay. Here  
15 we present computational evidence that these pathways are synergic for removing  
16 frameshifts.

17

18 **Frameshifting errors in gene expression**

19

20 All biochemical pathways are intrinsically stochastic processes. Transcription, splicing, and  
21 translation are especially error prone, with error rates 4-6 orders of magnitude higher than  
22 that of DNA polymerase (1–6). Such errors can result in single-amino acid substitutions, as  
23 well as truncation of the protein due to nonsense mutations or frameshifting errors. The latter  
24 can occur due to insertion and deletion events during transcription, splicing errors, and  
25 ribosomal slippage during translation (**Figure 1**).

26

27 Frameshifts in protein coding genes are likely to be among the most damaging events, as they  
28 result in truncated proteins which may be misfolded or form dominant negative alleles (7,8)  
29 **(Figure 1)**. This justifies an evolutionary pressure for cells to contain mRNA surveillance  
30 pathways that remove transcripts bearing frameshifts. Suppression of frameshift errors is  
31 thought to be one of the major roles of the mRNA quality control machinery (9).

32

### 33 **Nonsense-mediated decay for removing frameshifting errors**

34 In eukaryotes, nonsense-mediated decay (NMD) is a conserved mRNA surveillance pathway  
35 that is often assumed to fulfill a frameshift-removing role (10). This follows from the  
36 observation that frameshifts generate premature termination codons (PTCs), recognition of  
37 which targets the transcript for NMD. However, the quantitative effects of NMD, when  
38 measured, are often small (11,12). In addition, a large fraction native transcripts (between  
39 5%-30% depending on the genome) are targeted by NMD (13). In the context of mRNA  
40 quality control, these are poor evidence for NMD being an effective quality control pathway.

41

42 The mechanism of NMD may be species-specific (10,12) and has even been proposed  
43 to be a passive result of the degradation of unprotected transcripts (14). In yeast, NMD is  
44 thought to act on long 3'UTRs (15,16), so that transcripts bearing 3'UTRs longer than 250  
45 nucleotides are targeted by NMD **(Figure 1)**. Recent work from our group has shown that  
46 this is mostly true and, importantly, the strength of NMD depends linearly on 3'UTR length  
47 (11) **(Figure 3B)**. However, native 3'UTR lengths are highly variable, ranging from 0 to  
48 1461 nucleotides (17). Frameshifts in native transcripts with short 3'UTRs are unlikely to  
49 result in efficient NMD.

50

51 These data suggest that NMD is both inaccurate and inefficient discretizing “correct” vs  
52 “incorrect” transcripts. We propose that an efficient quality control pathway should be better  
53 able to distinguish and degrade incorrect transcripts.

54

## 55 **Codon bias and mRNA quality control**

56

57 Recent work from our group (11) provides an unexpected clue towards understanding  
58 mRNA quality control. We found that two mechanisms of co-translational regulation, NMD  
59 and codon bias-dependent mRNA expression (18,19) (**Figure 2A**) are genetically linked;  
60 both pathways are regulated by the DEAD-box RNA helicase Dbp2 and by promoter  
61 architecture. A quantitative analysis of the impact of these pathways on mRNA levels gives  
62 rise to the hypothesis that they may act in a synergistic manner to remove transcripts with  
63 frameshifts. In addition to generating a PTC, frameshifts generate a second signal of “wrong  
64 transcript”: a run of normally out-of-frame codons between the frameshift and the PTC that  
65 are now translated (**Figure 1**). Below we provide computational support of this hypothesis.

66

## 67 **The meaning and role of codon bias**

68

69 All transcriptomes exhibit imbalances in the synonymous codons used for each amino acid.  
70 Not all synonymous codons are equally abundant, a phenomena called “codon bias”(20,21).  
71 Highly expressed genes use codons translated by abundant tRNAs (22) and are coded by  
72 optimized codons (**Figure 2**), leading to efficient protein synthesis. Highly expressed genes  
73 with efficient translation initiation but with suboptimal codon usage are deleterious and affect  
74 the expression of the rest of the proteome (23).

75

76 It was previously noted that use of optimal codons increased not only protein levels, but also  
77 mRNA levels (24–26), suggesting that ribosome speed might regulate mRNA stability.  
78 Recently, a pathway that involves the DEAD-box RNA helicase Dhh1 was found to target  
79 transcripts with suboptimal codon usage for decay in a translation-dependent manner (18,27).  
80 Even short stretches of twelve suboptimal codons reduce mRNA levels (19), likely due to  
81 slower translation (28).

82

83 While most genes do not have highly optimized codon usage, the majority of the yeast  
84 transcriptome is populated by highly optimized mRNAs (**Figure 2B**). The top 10% of  
85 expressed genes have highly optimized codon usage. In yeast these genes account for 77% of  
86 the transcripts in a cell. Translational selection (29) will result in the optimized codon usage  
87 of constitutively highly expressed genes but will act less efficiently on genes with lower  
88 expression, genes that are rarely expressed, and of course on out-of-frame codons.

89

### 90 **Codon optimality for removing frameshifting errors**

91

92 In addition to producing PTCs, frameshifts are likely to introduce a stretch of non-optimized  
93 codons at the 3' end of the ORF (**Figure 1**). In genes with optimized codons, this will result in  
94 a sudden changes in translation efficiency after the frameshift, which will reduce protein  
95 synthesis and target the transcript for decay (**Figure 3A**). This reasoning follows the  
96 observation that the impact of low codon optimality on translation efficiency and mRNA  
97 decay is local and can act over as few as twelve codons (19,28). The magnitude of the  
98 decrease in codon optimality will be highest for transcripts with high codon optimization  
99 (most of the mRNAs in the cell (**Figure 2B**)), which correspond to highly expressed genes  
100 that likely bear most of the frameshifts (assuming a uniform distribution of errors across

101 transcripts (1)). Our hypothesis is that frameshift-removing mechanisms are especially  
102 relevant for such highly-expressed genes. Furthermore, the impact of low codon optimality  
103 close to the 3' end of the mRNA is higher ([Mishima and Tomari 2016](#)). In the case of a  
104 frameshift, the enrichment of non-optimal codons should be towards the end of the ORF,  
105 which predicts that the destabilizing effect will be even stronger.  
106

107 To compare the role of NMD and codon bias in mRNA quality control we ran a frameshift-  
108 introducing simulation on yeast transcripts. We generated random single-base deletions in  
109 native transcripts and calculated codon optimality (tRNA adaptation index, tAI (30)) and  
110 3'UTR length with and without the frameshift. Because errors occur on a per transcript basis,  
111 each gene received a number of errors proportional to its mRNA expression level (**Figure**  
112 **3C**).

113  
114 We found that almost all frameshifts produce a large decrease in tAI after the mutation  
115 (**Figure 3D**). The change in tAI range due to frameshifts decreases mRNA levels (11)  
116 (**Figure 3A**). In contrast, ~50% of errors produce 3'UTRs in the range of native 3'UTR  
117 lengths (**Figure 3D**), likely unaffected by NMD (11) (**Figure 3B**). These findings indicate  
118 that selection for codon-optimality (which acts on highly expressed genes) can be a robust  
119 way to define “correct transcripts” and thus remove transcripts that contain frameshifts

## 120 **Conclusions and open questions**

121

122 Cells need to remove transcripts with errors; mutants with increased error rates or that are  
123 unable to remove transcripts with errors grow slowly (1,31). Frameshift errors are likely to be  
124 deleterious, both by generating deleterious protein isoforms, and because suboptimal codons  
125 titrate away both tRNAs and ribosomes (23,32). However, both the sequence features that

126 cells recognize and the mechanisms by which they do so remain poorly understood. Many  
127 open questions remain.

128

129 NMD is weak (11,12) and affects 5-20% of the native transcriptome (13), so it may be both  
130 inefficient and unspecific for removing errors. Removing transcripts with low codon  
131 optimality may be more accurate and efficient. This is consistent with the fact that NMD  
132 strength follows a linear relationship with 3'UTR length, while codon optimality has a  
133 sigmoidal impact on expression (**Figure 3**). Small changes in codon optimality can lead to a  
134 large decrease in expression.

135

136 We observe that ~50% of frameshifts generate 3'UTRs within the range of native transcripts,  
137 likely unaffected by NMD. This exemplifies how a model based on a qualitative basis  
138 ("NMD removes frameshifts *because* these have longer 3'UTRs") can fail to predict of the  
139 quantitative behavior of a system.

140

141 Our recent work suggests a genetic link between codon bias and NMD (11). Here we report a  
142 possible explanation of this interaction, but it remains to be seen which is the impact on  
143 measured expression levels of both processes. The mechanism of this link also remains to be  
144 established.

145

146 In frameshifted mRNAs, the quantitative impact of the low-tAI stretches of ORF in  
147 expression remains elusive. It will be interesting to see if they can explain more or less  
148 quality control than NMD. In addition, the effect of codon bias on expression is expected to  
149 impact protein levels (20,23), not only mRNA. This predicts that the impact of codon bias on  
150 expression is higher than reported here (**Figure 3A**), which is not true for NMD. This could

151 explain why we observe a lot of splice isoforms that have PTCs in humans, which may arise  
152 from frameshifting splicing errors. NMD does not remove them (as we can detect them), but  
153 it is likely that they have lower codon adaptation and reduced protein levels.

154

155 Finally, this work raises a possible explanation for an adaptive benefit of imbalanced tRNA  
156 repertoires (22), which would confer the ability to degrade transcripts that are not supposed to  
157 be highly expressed. It is almost certain that cells avoid selecting the expression of ORFs  
158 with a random composition of codons. Frameshifts generate such random stretches, that are  
159 likely targeted for decay. Thus, there may be an evolutionary pressure for imbalanced tRNA  
160 repertoires to ensure proper mechanisms of mRNA quality control. It will be interesting to  
161 determine if this process has driven the evolution of codon bias and codon-usage associated  
162 mRNA stability, or it is a passive result due to the fact that almost any frameshift will reduce  
163 the optimality of the already very optimal genes.

164

165

#### 166 **Funding details:**

167 This work was supported by Ministerio de Economía y Competitividad (MINECO) and the  
168 Fondo Europeo de Desarrollo Regional (FEDER) BFU2015-68351-P (MINECO / ERDF EU),  
169 AGAUR (2014SGR0974 and 2017SGR1054) and the Unidad de Excelencia María de Maeztu,  
170 funded by MINECO (MDM-2014-0370).

171

#### 172 **Disclosure statement**

173 The authors declare that they have no competing interests.

174

#### 175 **Figure legends**

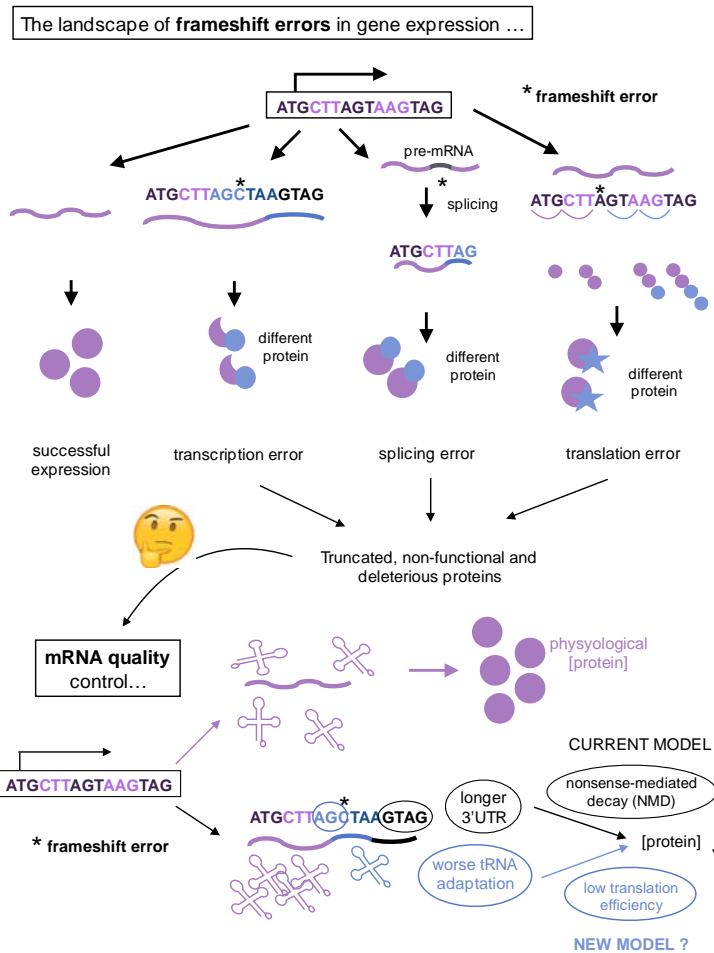

176

177 **Figure 1: The impact of frameshifting errors in gene expression.** Gene expression can  
 178 result in frameshifting errors (indicated as \*) due to transcriptional insertion/deletion  
 179 epimutations, errors in splicing or ribosomal slippage during translation (top). These  
 180 processes potentially generate deleterious proteins, which justifies the need of mRNA quality  
 181 control mechanisms in cells (bottom). In the absence of errors, mRNAs are translated leading  
 182 to physiological protein levels. The current model indicates that frameshifting errors generate  
 183 Premature Termination Codons (PTC) that trigger Nonsense-Mediated Decay (NMD) on  
 184 them, mainly because of the generated long 3'UTR (in yeast). Our hypothesis is that NMD is  
 185 often nonspecific for errors, so that other quality control mechanisms must exist. We note  
 186 that another signal of "incorrectness" may appear in transcripts with frameshifts: a stretch of  
 187 poorly-optimized codons (in blue, indicating worse tRNA adaptation) between the error and  
 188 the PTC. This should lead to reduced translation efficiency, mRNA decay and lower protein  
 189 concentrations of the frameshifted transcript.



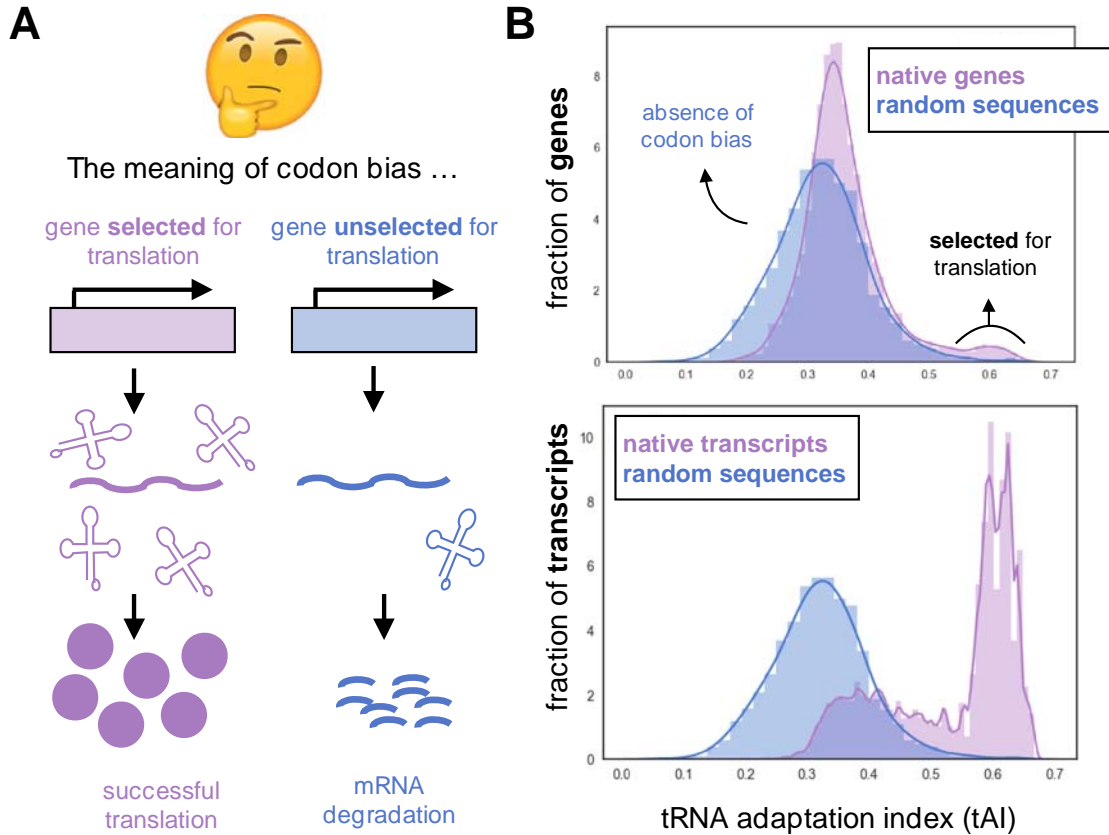

190

191 **Figure 2: The meaning of codon bias in the transcriptome.** (A) Highly expressed genes  
192 are often selected to have optimized codons in agreement with the cellular tRNA pool,  
193 allowing efficient translation of them (purple). This is known as “translational selection” (20–  
194 23). On the other hand, genes with a poor codon optimization are inefficiently translated and  
195 targeted for mRNA decay (blue) (18). (B) Top: in yeast, most native *genes* (purple) exhibit a  
196 tRNA Adaptation Index (tAI, as a measure of codon optimality) in the range of ORFs  
197 predicted from random transcription throughout the genome (blue). Such random ORFs  
198 simulate the absence of codon bias in terms of tRNA adaptation. A small fraction of *genes*  
199 have non-random tAI, which corresponds to genes “selected for translation”. Bottom: most  
200 native *transcripts* (purple) have high tAI, as compared to random ORFs (blue). This  
201 histogram was generated weighting each gene by mRNA expression level (which is  
202 exponentially distributed), which indicates the per-transcript distribution of tAI.

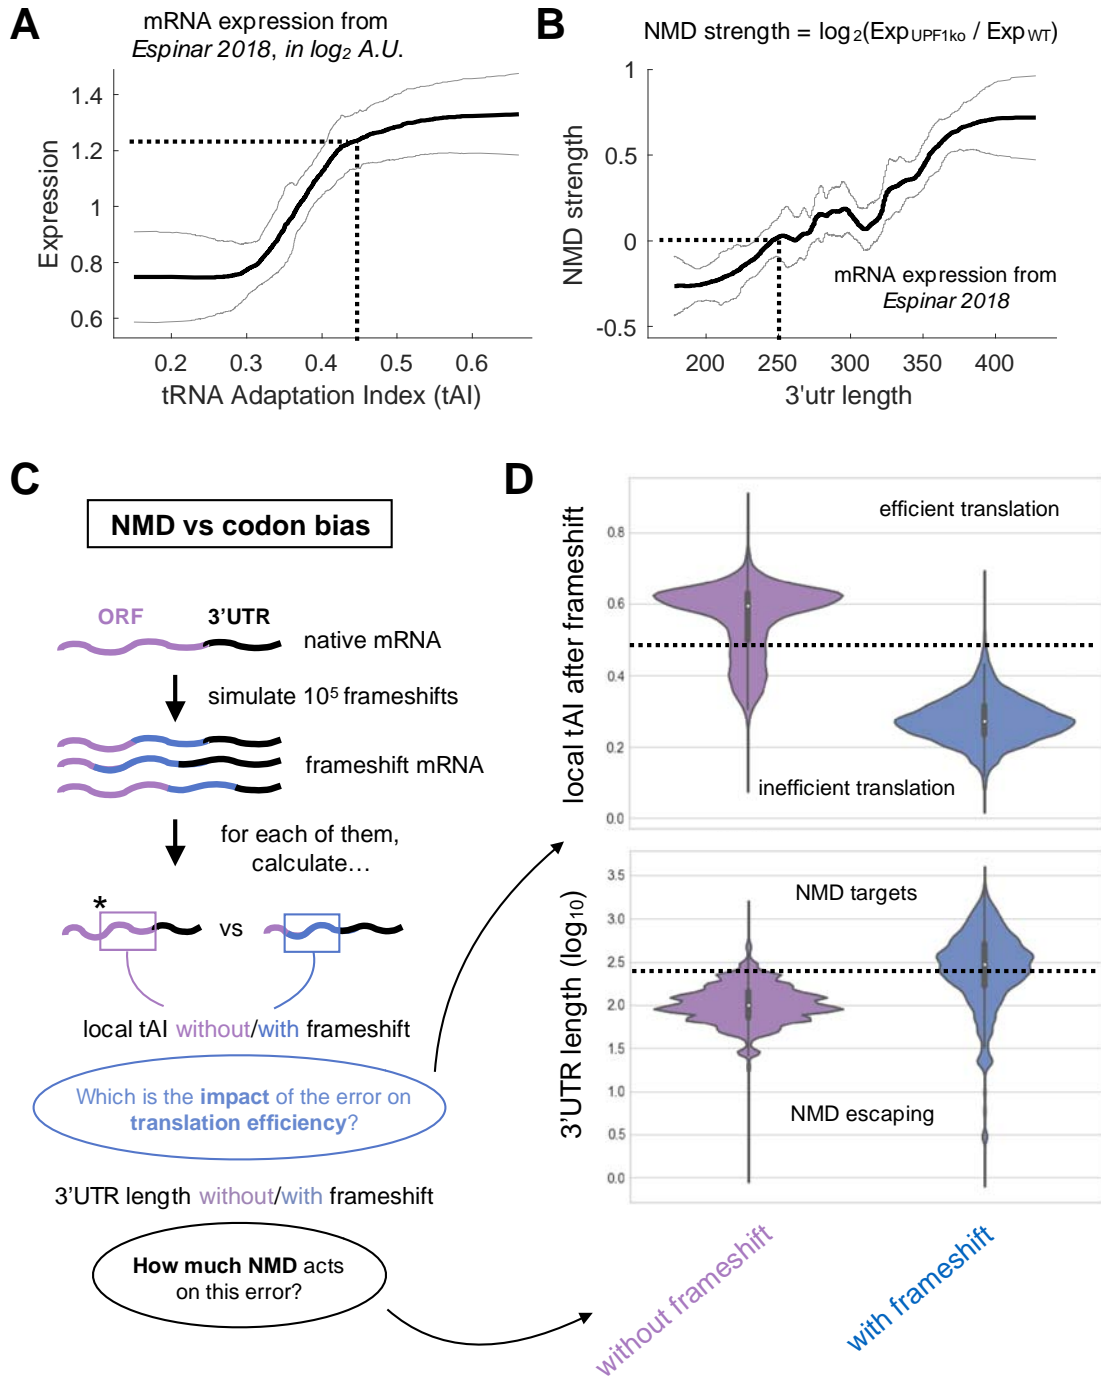

203

204 **Figure 3: Codon bias can implement quality control of mRNAs with frameshifts.** (A) tAI  
 205 follows a negative sigmoidal relationship with mRNA expression levels. Expression was  
 206 calculated as the  $\log_2$ -ratio between mRNA and DNA abundance of a synthetic ORF library  
 207 of random fragments from the yeast genome, expressed in a plasmid (11). The dashed line

208 represent a threshold in which decreasing tAI reduces expression. **(B)** NMD strength follows  
209 a positive linear relationship with 3'UTR length. NMD was measured as the expression  
210 (calculated as in A) log<sub>2</sub>-ratio between identical ORF libraries built in a *Δupf1* or a *wt* strain  
211 (11). This ratio indicates the impact of NMD for each sequence in the library (which has  
212 variable 3'UTR lengths), as UPF1 is responsible for NMD (10). The dashed line represent a  
213 threshold in which increasing 3'UTR generates NMD (positive values in the Y axis). **(C)** A  
214 pipeline for predicting the impact of NMD and codon on frameshift quality control. As an  
215 example of frameshift, we simulated 10<sup>5</sup> random single-base deletions on native transcripts.  
216 Each gene includes a number of mutations proportional to its expression level. For each error  
217 (and corresponding native transcript) we calculated tAI between the frameshift and the PTC  
218 (local tAI) and the resulting 3'UTR length. We used these as measures of the impact of error  
219 on translation efficiency and/or NMD targeting. **(D)** Transcripts with frameshifts (blue) have  
220 lower tAI (top) and longer 3'UTRs (bottom), when compared to native mRNAs (purple). The  
221 dashed lines represent the thresholds described in A,B.

222

## 223 **References**

- 224 1. Gout J-F, Li W, Fritsch C, Li A, Haroon S, Singh L, et al. The landscape of transcription  
225 errors in eukaryotic cells. *Science Advances*. 2017 Oct 1;3(10):e1701484.
- 226 2. Gout J-F, Thomas WK, Smith Z, Okamoto K, Lynch M. Large-scale detection of in vivo  
227 transcription errors. *Proc Natl Acad Sci U S A*. 2013 Nov 12;110(46):18584–9.
- 228 3. Carey LB. RNA polymerase errors cause splicing defects and can be regulated by  
229 differential expression of RNA polymerase subunits. *Elife* [Internet]. 2015 Dec 10;4.  
230 Available from: <http://dx.doi.org/10.7554/eLife.09945>
- 231 4. Milo R, Jorgensen P, Moran U, Weber G, Springer M. BioNumbers--the database of key  
232 numbers in molecular and cell biology. *Nucleic Acids Res*. 2010 Jan;38(Database  
233 issue):D750–3.
- 234 5. Imashimizu M, Oshima T, Lubkowska L, Kashlev M. Direct assessment of transcription  
235 fidelity by high-resolution RNA sequencing. *Nucleic Acids Res*. 2013 Oct  
236 1;41(19):9090–104.

- 237 6. Fox-Walsh KL, Hertel KJ. Splice-site pairing is an intrinsically high fidelity process.  
238 Proc Natl Acad Sci U S A. 2009 Feb 10;106(6):1766–71.
- 239 7. Weterman MAJ, Sorrentino V, Kasher PR, Jakobs ME, van Engelen BGM, Fluiters K, et  
240 al. A frameshift mutation in LRSAM1 is responsible for a dominant hereditary  
241 polyneuropathy. Hum Mol Genet. 2012 Jan 15;21(2):358–70.
- 242 8. Sadhu MJ, Bloom JS, Day L, Siegel JJ, Kosuri S, Kruglyak L. Highly parallel genome  
243 variant engineering with CRISPR–Cas9. Nat Genet. 2018 Apr 9;50(4):510–4.
- 244 9. Isken O, Maquat LE. Quality control of eukaryotic mRNA: safeguarding cells from  
245 abnormal mRNA function. Genes Dev. 2007 Aug 1;21(15):1833–3856.
- 246 10. Behm-Ansant I, Kashima I, Rehwinkel J, Saulière J, Wittkopp N, Izaurralde E. mRNA  
247 quality control: An ancient machinery recognizes and degrades mRNAs with nonsense  
248 codons. FEBS Lett. 2007 Jun 19;581(15):2845–53.
- 249 11. Espinar L, Schikora Tamarit MÀ, Domingo J, Carey LB. Promoter architecture  
250 determines cotranslational regulation of mRNA. Genome Res [Internet]. 2018 Mar 22;  
251 Available from: <http://dx.doi.org/10.1101/gr.230458.117>
- 252 12. Lindeboom RGH, Supek F, Lehner B. The rules and impact of nonsense-mediated  
253 mRNA decay in human cancers. Nat Genet [Internet]. 2016 Sep 12; Available from:  
254 <http://dx.doi.org/10.1038/ng.3664>
- 255 13. Peccarelli M, Kebaara BW. Regulation of natural mRNAs by the nonsense-mediated  
256 mRNA decay pathway. Eukaryot Cell. 2014 Sep;13(9):1126–35.
- 257 14. Brogna S, McLeod T, Petric M. The Meaning of NMD: Translate or Perish. Trends  
258 Genet. 2016 Jul;32(7):395–407.
- 259 15. Zhang J, Sun X, Qian Y, LaDuca JP, Maquat LE. At least one intron is required for the  
260 nonsense-mediated decay of triosephosphate isomerase mRNA: a possible link between  
261 nuclear splicing and cytoplasmic translation. Mol Cell Biol. 1998 Sep;18(9):5272–83.
- 262 16. Amrani N, Ganesan R, Kervestin S, Mangus DA, Ghosh S, Jacobson A. A faux 3'-UTR  
263 promotes aberrant termination and triggers nonsense-mediated mRNA decay. Nature.  
264 2004 Nov 4;432(7013):112–8.
- 265 17. Nagalakshmi U, Wang Z, Waern K, Shou C, Raha D, Gerstein M, et al. The  
266 transcriptional landscape of the yeast genome defined by RNA sequencing. Science.  
267 2008 Jun 6;320(5881):1344–9.
- 268 18. Radhakrishnan A, Chen Y-H, Martin S, Alhusaini N, Green R, Collier J. The DEAD-Box  
269 Protein Dhh1p Couples mRNA Decay and Translation by Monitoring Codon  
270 Optimality. Cell [Internet]. Available from:  
271 <http://www.sciencedirect.com/science/article/pii/S0092867416311503>
- 272 19. Chen S, Li K, Cao W, Wang J, Zhao T, Huan Q, et al. Codon-Resolution Analysis  
273 Reveals a Direct and Context-Dependent Impact of Individual Synonymous Mutations  
274 on mRNA Level. Mol Biol Evol. 2017 Nov 1;34(11):2944–58.

- 275 20. Ikemura T. Codon usage and tRNA content in unicellular and multicellular organisms.  
276 Mol Biol Evol. 1985 Jan;2(1):13–34.
- 277 21. Grantham R. Working of the genetic code. Trends Biochem Sci. 1980 Dec 1;5(12):327–  
278 31.
- 279 22. Novoa EM, Ribas de Pouplana L. Speeding with control: codon usage, tRNAs, and  
280 ribosomes. Trends Genet. 2012 Nov;28(11):574–81.
- 281 23. Frumkin I, Lajoie MJ, Gregg CJ, Hornung G, Church GM, Pilpel Y. Codon usage of  
282 highly expressed genes affects proteome-wide translation efficiency. Proc Natl Acad Sci  
283 U S A [Internet]. 2018 May 7; Available from:  
284 <http://dx.doi.org/10.1073/pnas.1719375115>
- 285 24. Te'o VS, Cziferszky AE, Bergquist PL, Nevalainen KM. Codon optimization of  
286 xylanase gene xynB from the thermophilic bacterium *Dictyoglomus thermophilum* for  
287 expression in the filamentous fungus *Trichoderma reesei*. FEMS Microbiol Lett. 2000  
288 Sep 1;190(1):13–9.
- 289 25. Presnyak V, Alhusaini N, Chen Y-H, Martin S, Morris N, Kline N, et al. Codon  
290 optimality is a major determinant of mRNA stability. Cell. 2015 Mar 12;160(6):1111–  
291 24.
- 292 26. Boël G, Letso R, Neely H, Price WN, Wong K-H, Su M, et al. Codon influence on  
293 protein expression in *E. coli* correlates with mRNA levels. Nature. 2016 Jan  
294 21;529(7586):358–63.
- 295 27. Harigaya Y, Parker R. Codon optimality and mRNA decay. Cell Res. 2016  
296 Dec;26(12):1269–70.
- 297 28. Yu C-H, Dang Y, Zhou Z, Wu C, Zhao F, Sachs MS, et al. Codon Usage Influences the  
298 Local Rate of Translation Elongation to Regulate Co-translational Protein Folding. Mol  
299 Cell. 2015 Sep 3;59(5):744–54.
- 300 29. Akashi H, Eyre-Walker A. Translational selection and molecular evolution. Curr Opin  
301 Genet Dev. 1998 Dec;8(6):688–93.
- 302 30. dos Reis M, Wernisch L, Savva R. Unexpected correlations between gene expression  
303 and codon usage bias from microarray data for the whole *Escherichia coli* K-12 genome.  
304 Nucleic Acids Res. 2003 Dec 1;31(23):6976–85.
- 305 31. Cherry JM, Hong EL, Amundsen C, Balakrishnan R, Binkley G, Chan ET, et al.  
306 *Saccharomyces* Genome Database: the genomics resource of budding yeast. Nucleic  
307 Acids Res. 2012 Jan;40(Database issue):D700–5.
- 308 32. Shah P, Ding Y, Niemczyk M, Kudla G, Plotkin JB. Rate-limiting steps in yeast protein  
309 translation. Cell. 2013 Jun 20;153(7):1589–601.
